# Supplementary material for: The Vienna self-assessment questionnaire: a usable tool towards more health-literate hospitals? Explorative case studies in three hospitals in Belgium
Source: PubMed Central journal article supplement (PMC8011166; doi:10.1186/s12913-021-06211-y), 2021-03-31
Supplement: 12913_2021_6211_MOESM2_ESM.pdf [file 12913_2021_6211_MOESM2_ESM.pdf]

## Remote evaluation of the V-HLO-Fr intervention

### Interview guide

(Translated)

DATE:

IDENTITY/HOSPITAL:

**Question 1:** How would you qualify the workload requested for the intervention?

More generally: feasibility of the process?

**Question 2:** Did the intervention contribute to your knowledge of the subject "Health literacy in healthcare institutions"?

**Question 3:** Has the round table had, at this stage, an impact in your institution? For example:

**Question 4:** Do you think that the result of organisational diagnosis you have just received could be useful to you?

More globally:

- Utilities / impact of the process?

- Follow-up given / envisaged?

- Any suggestions for improvement?

(Transversely: did context-specific points spontaneously emerge from the discussion: temporality, power relationship, group composition, etc....?)
